# Supplementary material for: Transcriptomic network analyses of leaf dehydration responses identify highly connected ABA and ethylene signaling hubs in three grapevine species differing in drought tolerance
Source: PubMed Central journal article supplement (PMC4877820; doi:10.1186/s12870-016-0804-6), 2016-05-23

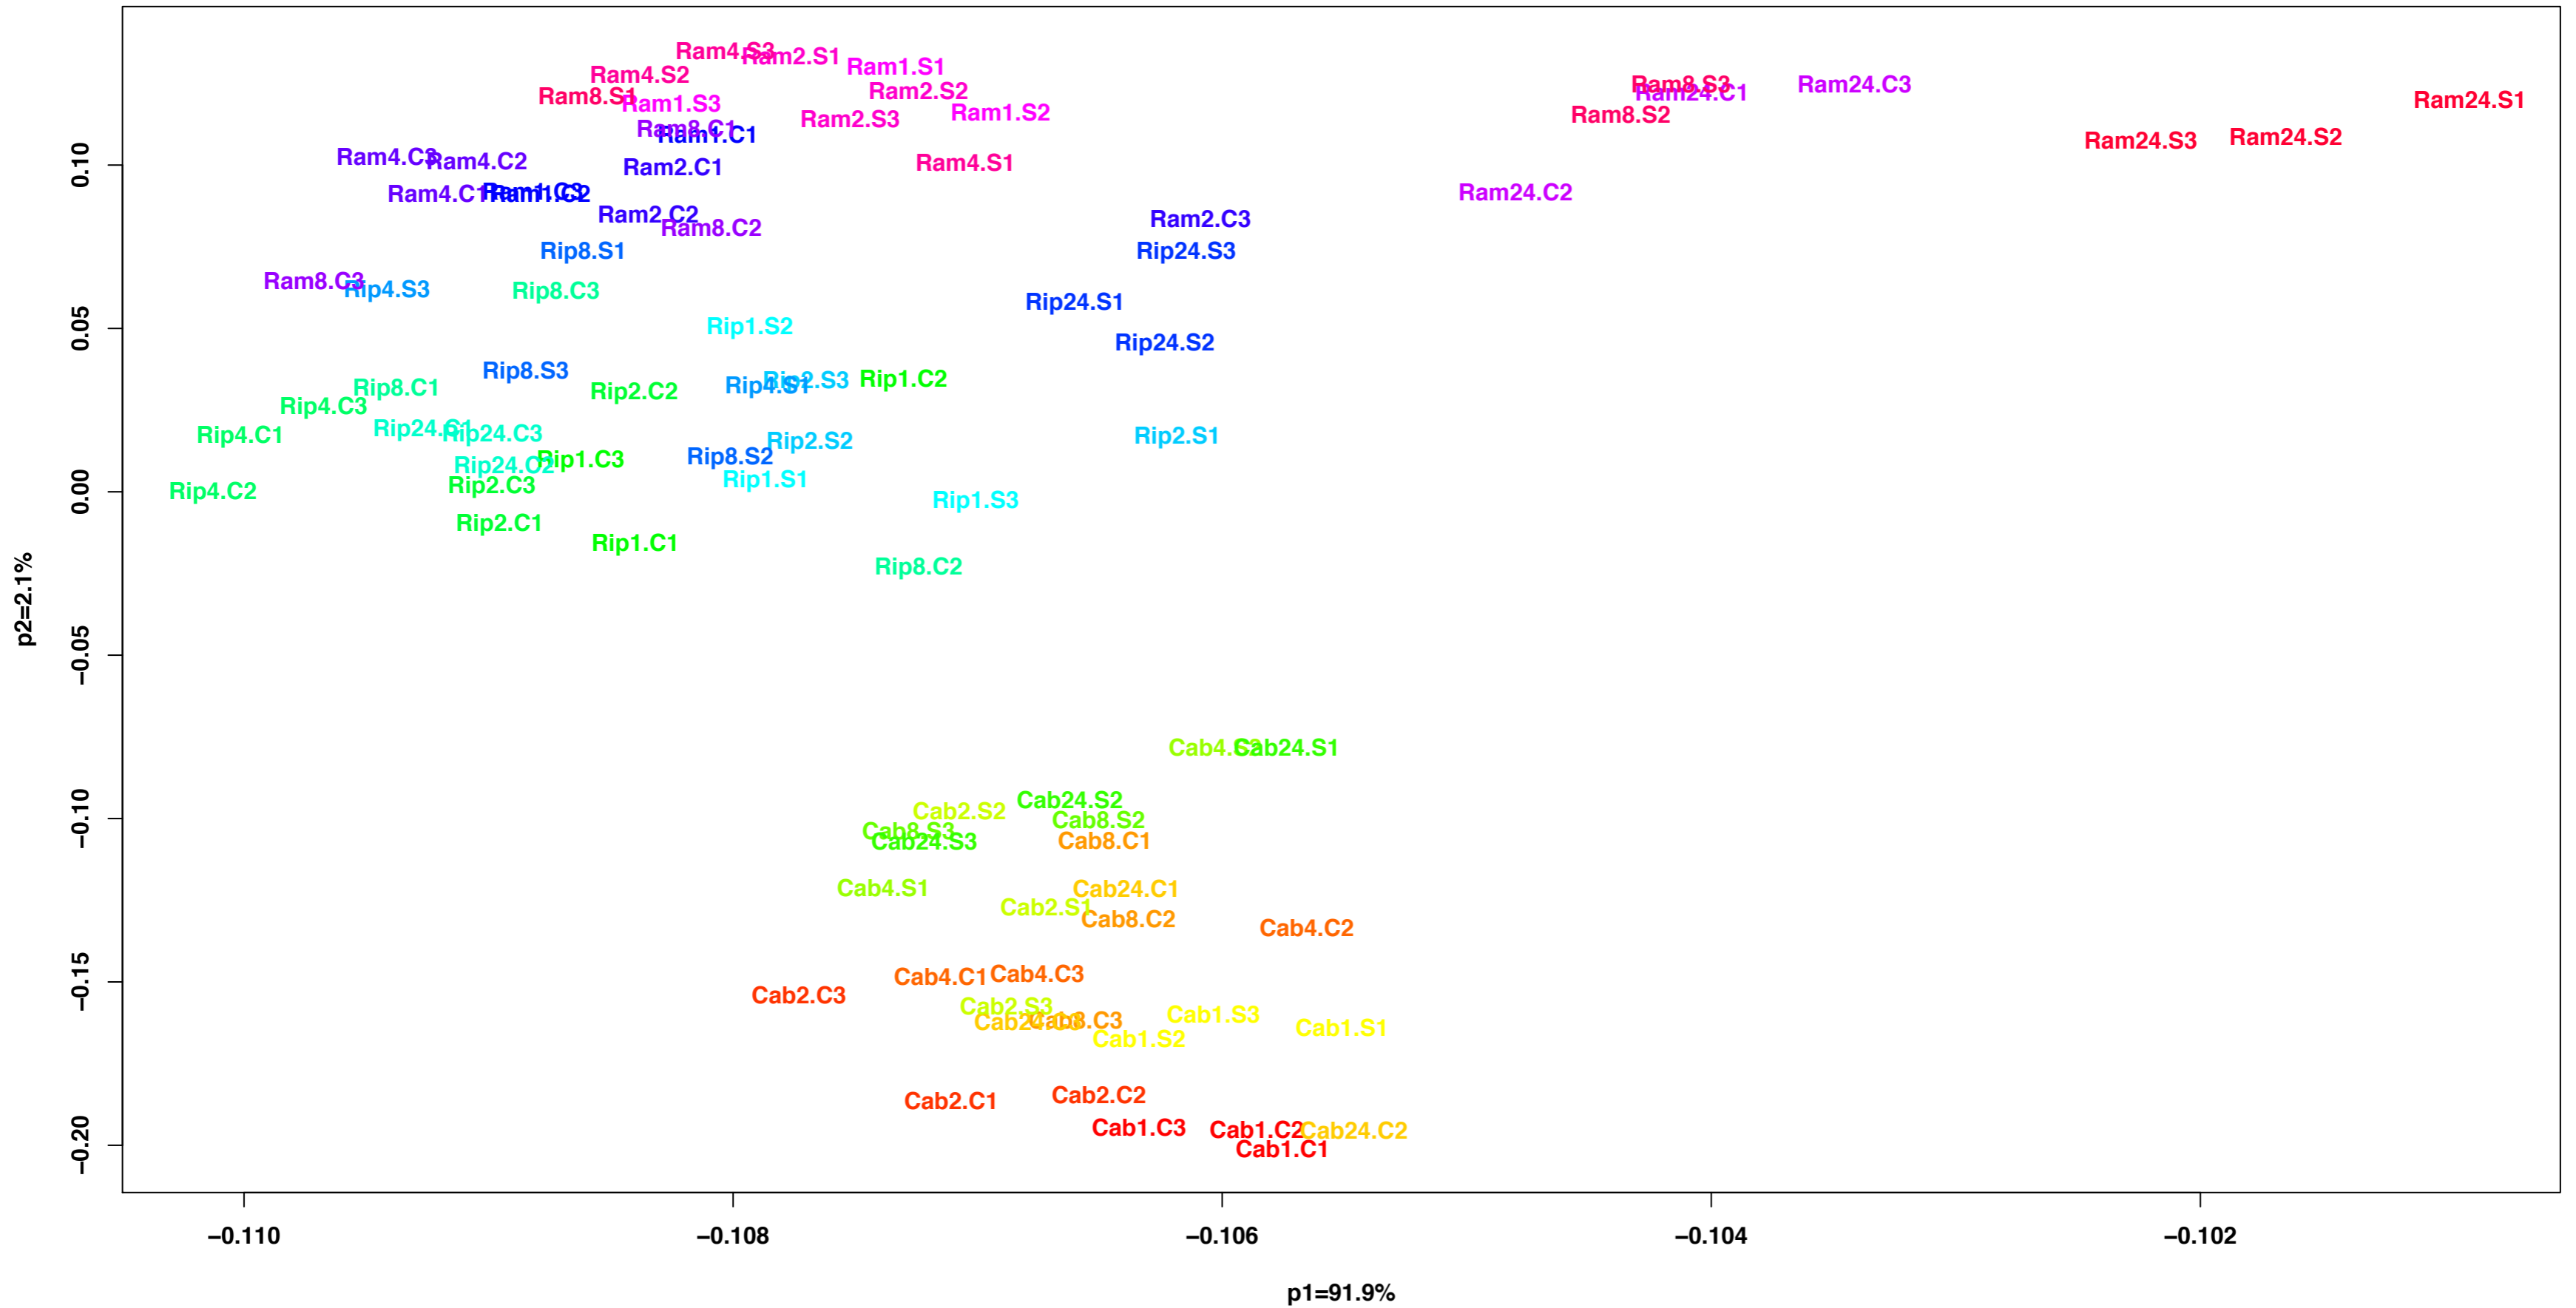

Supplement: 12870_2016_804_MOESM1_ESM.pdf [file 12870_2016_804_MOESM1_ESM.pdf]
